# Supplementary material
Source: PubMed Central journal article supplement (PMC6977102)
Supplement: ao9b02616_si_001.pdf [file ao9b02616_si_001.pdf]

## Supporting Information

# **Design and characterization of cyclosporine A-loaded nanofibers for enhanced drug dissolution**

*Poornima Dubey<sup>a</sup>, Susan A. Barker<sup>a,b</sup> and Duncan Q.M. Craig<sup>a\*</sup>*

<sup>a</sup>UCL School of Pharmacy, 29-39 Brunswick Square, London WC1N 1AX, United Kingdom

<sup>b</sup>Current address - Medway School of Pharmacy, The Universities of Greenwich and Kent at Medway, Anson Building, Kent ME4 4TB, United Kingdom

\*Corresponding author

Email addresses:

[p.dubey@ucl.ac.uk](mailto:p.dubey@ucl.ac.uk) (P.Dubey)

[s.barker@greenwich.ac.uk](mailto:s.barker@greenwich.ac.uk) (S.A.Barker)

[duncan.craig@ucl.ac.uk](mailto:duncan.craig@ucl.ac.uk) (D.Q.M. Craig)

a)

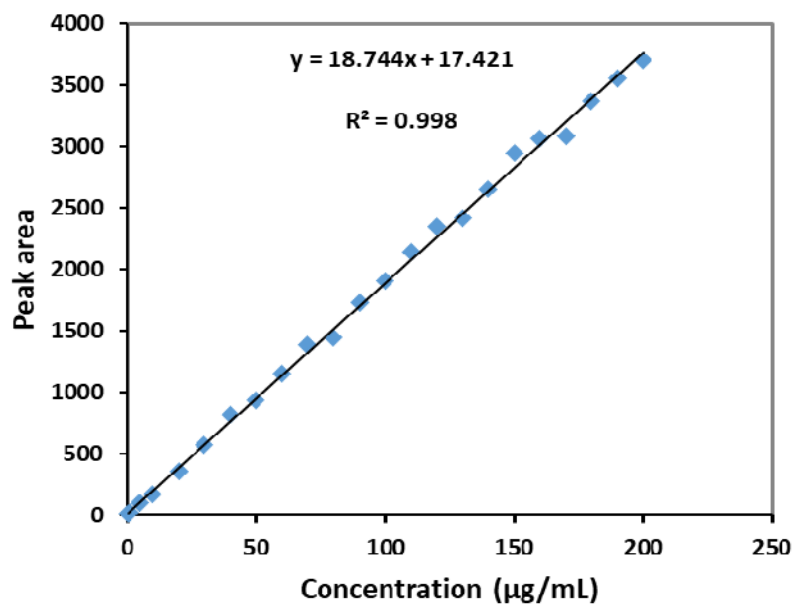

b)

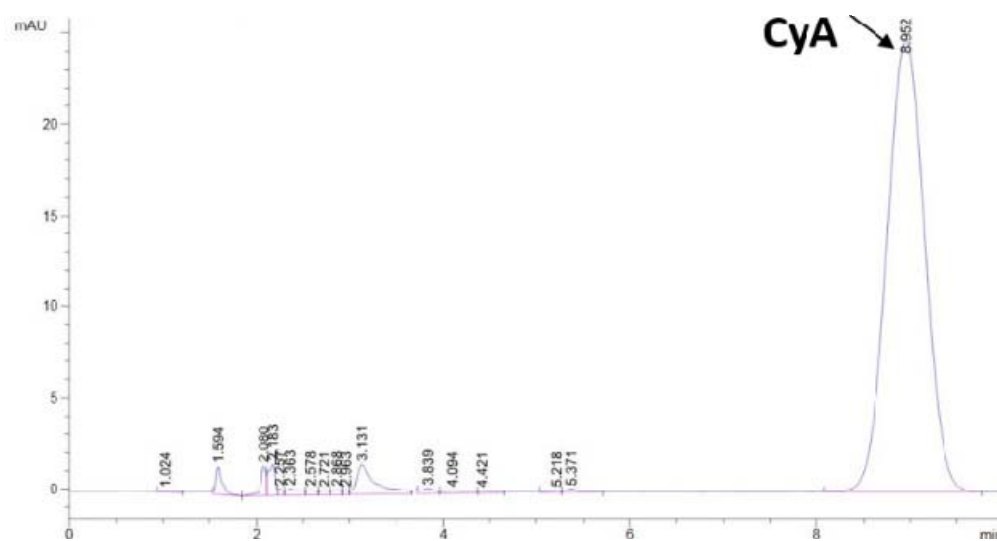

Figure S1: a) Plot of CyA concentration versus peak area obtained by HPLC-UV b) Typical chromatogram for the CyA HPLC-UV analysis at 210 nm

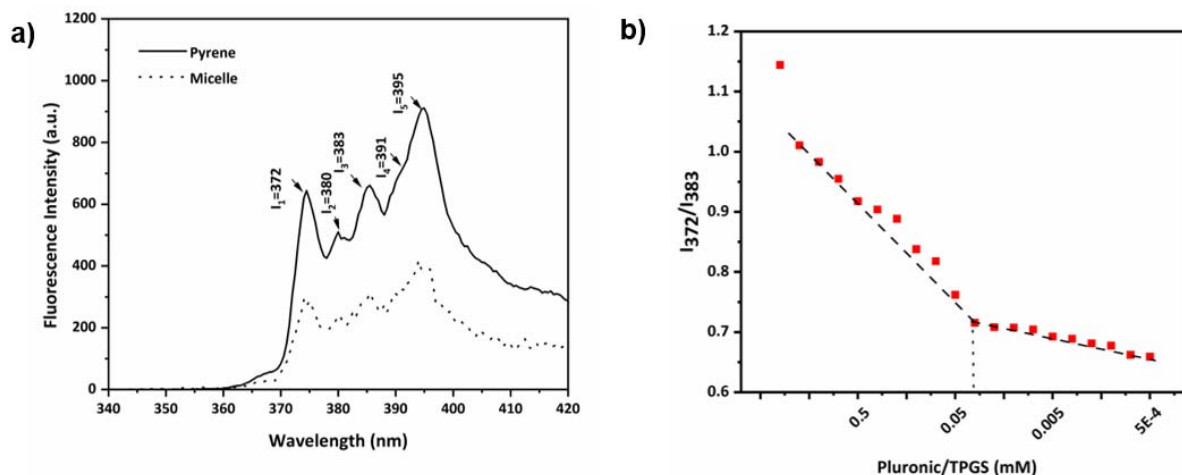

Figure S2: a) Fluorescence spectra of pyrene (0.6  $\mu$ M) as fluorescence hydrophobic probe alone and in micellar suspension (3:2 F127/TPGS) at 25°C, b) Plot of the fluorescence emission of pyrene at the  $I_{372}/I_{383}$  ratio in the presence of various concentrations (0.0005mM-0.1mM) of copolymers F127/TPGS (3:2 molar ratio).

| Surfactants | Ratios | CMC (mM) |
|-------------|--------|----------|
| TPGS        | 1:0    | 0.46     |
| F127        | 1:0    | 0.093    |
| F127/TPGS   | 1:1    | 0.13     |
| F127/TPGS   | 1:4    | 0.023    |
| F127/TPGS   | 3:2    | 0.062    |

Table S1: Critical micelle concentrations (mM) of surfactants Pluronic F127 and TPGS alone, and in combination at a range of molar ratios from 1:0, 1:1, 1:4 and 3:2 respectively.

| Surfactants               | Concentration ( $\mu\text{g/mL}$ ) |
|---------------------------|------------------------------------|
| <b>10mM F127/TPGS</b>     | 933.8                              |
| <b>1mM F127/TPGS</b>      | 122.3                              |
| <b>0.1mM F127/TPGS</b>    | 73.0                               |
| <b>0.0005mM F127/TPGS</b> | 52.4                               |
| <b>Alone PBS</b>          | 7.3                                |
| <b>PBS+30% Ethanol</b>    | 12.0                               |
| <b>PBS+0.5%Tween</b>      | 14.0                               |

*Table S2: Equilibrium solubility of CyA in relation to molar concentration (0.0005mM-10mM) of surfactant mixture (F127:TPGS; 3:2 molar ratio) in aqueous solution at 37°C.*

| Functional groups           | Wavenumber ( $\text{cm}^{-1}$ ) of CyA | Wavenumber ( $\text{cm}^{-1}$ ) of CyA loaded micelle |
|-----------------------------|----------------------------------------|-------------------------------------------------------|
| <b>n(C-H) alkyl (s)</b>     | 2960, 2930, 2875                       | 2880                                                  |
| <b>Amine, O-H (b)</b>       | 3305                                   | -                                                     |
| <b>C=O (s)</b>              | 1290                                   | 1245                                                  |
| <b>CONH</b>                 | 1630                                   | 1625                                                  |
| <b>O-H (b)</b>              | 1475                                   | 1465                                                  |
| <b>C-H<sub>2</sub> (as)</b> | 1410                                   | 1415                                                  |
| <b>C-O-C(s)</b>             | 1205                                   | 1235                                                  |
| <b>C-N (s)</b>              | 1295, 1255                             | 1280, 1240                                            |
| <b>C-O (s)</b>              | -                                      | 1340                                                  |
| <b>C-N (s)</b>              | 1090                                   | 1100                                                  |
| <b>C=C (s)</b>              | 975                                    | 965                                                   |

*Table S3: Major vibrational frequencies showed in the IR spectrum of Cyclosporine A alone and on incorporation into 3:2 F127/TPGS micelles (where notation s=symmetric, as= asymmetric and b= bending vibrations).*

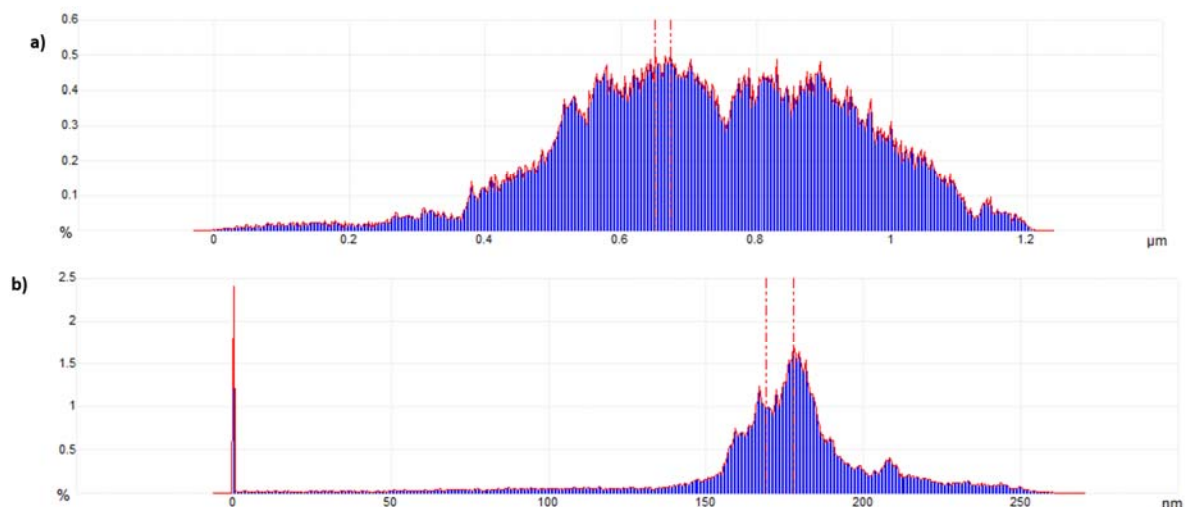

*Figure S3: Histogram of a) unloaded PVP nanofibers and b) CyA/micelle loaded nanofibers showing the height distribution for the two sets of samples; analysis performed using AFM Nanoscope analysis software version 1.70.*

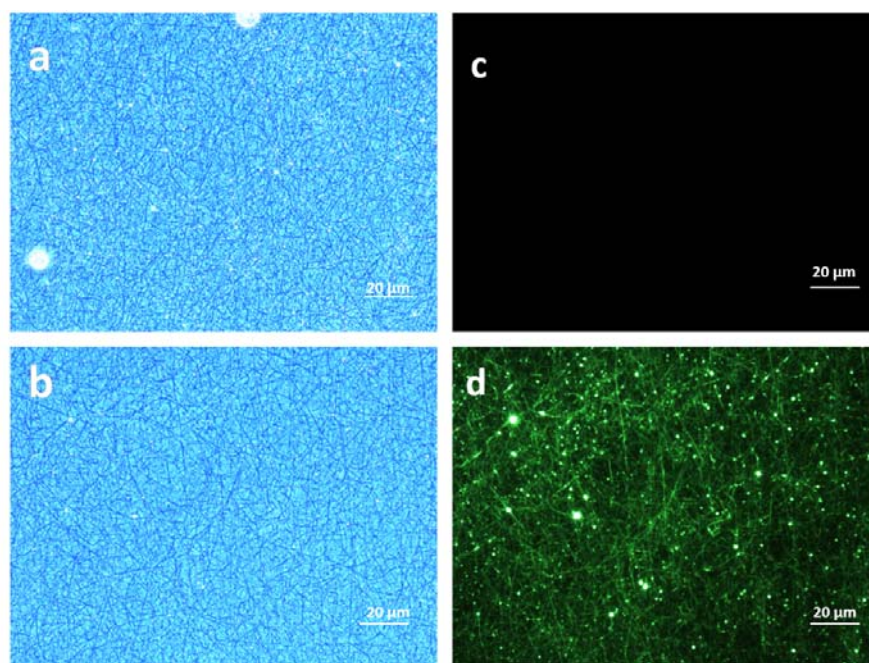

*Figure S4: Investigation of micelle loading into nanofibers using fluorescence microscopic imaging: a, c) blank PVP nanofibers under bright field and green fluorescence protein (GFP) filter and b, d) coumarin-6 loaded micelles incorporated into PVP nanofibers under bright field and GFP filters respectively. The images were taken using a 20X objective lens.*

| Model                                             | Parameter                                                                                                                                                                                                                                                                                                                                                                                                                                                                                                                                                                                                                                                                                                                                                           | CyA micelles loaded nanofiber<br>Formulation |         |         | Factors                                                                                                                                                                                                                                                                                                             |
|---------------------------------------------------|---------------------------------------------------------------------------------------------------------------------------------------------------------------------------------------------------------------------------------------------------------------------------------------------------------------------------------------------------------------------------------------------------------------------------------------------------------------------------------------------------------------------------------------------------------------------------------------------------------------------------------------------------------------------------------------------------------------------------------------------------------------------|----------------------------------------------|---------|---------|---------------------------------------------------------------------------------------------------------------------------------------------------------------------------------------------------------------------------------------------------------------------------------------------------------------------|
|                                                   |                                                                                                                                                                                                                                                                                                                                                                                                                                                                                                                                                                                                                                                                                                                                                                     | pH 1.2                                       | pH 7.4  | pH 6.8  |                                                                                                                                                                                                                                                                                                                     |
| <b>Zero order</b><br>$F_t= k_0 t$                 | $k_0$                                                                                                                                                                                                                                                                                                                                                                                                                                                                                                                                                                                                                                                                                                                                                               | 7.6520                                       | 8.154   | 8.488   | $k_0$ -apparent dissolution rate constant.                                                                                                                                                                                                                                                                          |
|                                                   | $R^2_{adj}$                                                                                                                                                                                                                                                                                                                                                                                                                                                                                                                                                                                                                                                                                                                                                         | 0.9868                                       | 0.9943  | 0.9666  |                                                                                                                                                                                                                                                                                                                     |
|                                                   | AIC                                                                                                                                                                                                                                                                                                                                                                                                                                                                                                                                                                                                                                                                                                                                                                 | 73.1951                                      | 62.9757 | 86.9356 |                                                                                                                                                                                                                                                                                                                     |
|                                                   | MSC                                                                                                                                                                                                                                                                                                                                                                                                                                                                                                                                                                                                                                                                                                                                                                 | 4.1201                                       | 5.0192  | 3.2554  |                                                                                                                                                                                                                                                                                                                     |
| <b>Korsmeyer-Peppas</b><br>$F=k_{KP} * t^n$       | $k_{KP}$                                                                                                                                                                                                                                                                                                                                                                                                                                                                                                                                                                                                                                                                                                                                                            | 11.366                                       | 10.034  | 13.721  | n- the diffusional exponent indicating the drug-release mechanism<br>$k_{KP}$ - the release constant incorporating structural and geometric characteristics of the drug-dosage form                                                                                                                                 |
|                                                   | n                                                                                                                                                                                                                                                                                                                                                                                                                                                                                                                                                                                                                                                                                                                                                                   | 0.825                                        | 0.908   | 0.785   |                                                                                                                                                                                                                                                                                                                     |
|                                                   | $R^2_{adj}$                                                                                                                                                                                                                                                                                                                                                                                                                                                                                                                                                                                                                                                                                                                                                         | 0.9942                                       | 0.9980  | 0.9927  |                                                                                                                                                                                                                                                                                                                     |
|                                                   | AIC                                                                                                                                                                                                                                                                                                                                                                                                                                                                                                                                                                                                                                                                                                                                                                 | 61.5753                                      | 49.0621 | 66.5040 |                                                                                                                                                                                                                                                                                                                     |
|                                                   | MSC                                                                                                                                                                                                                                                                                                                                                                                                                                                                                                                                                                                                                                                                                                                                                                 | 4.9501                                       | 6.0130  | 4.7148  |                                                                                                                                                                                                                                                                                                                     |
| <b>Hopfenberg</b><br>$F=100*[1-(1-(k_{HB}*t)^n)]$ | $k_{HB}$                                                                                                                                                                                                                                                                                                                                                                                                                                                                                                                                                                                                                                                                                                                                                            | 0.062                                        | 0.077   | 0.075   | The combined constant, $k_{HB} = k_0/(C_0 \times a_0)$ ; where $k_0$ is the erosion rate constant, $C_0$ is the initial concentration of drug in the matrix, $a_0$ is the initial radius for a sphere or cylinder or the half-thickness for a slab; n is 1, 2, and 3 for a slab, cylinder, and sphere, respectively |
|                                                   | n                                                                                                                                                                                                                                                                                                                                                                                                                                                                                                                                                                                                                                                                                                                                                                   | 1.507                                        | 1.156   | 1.372   |                                                                                                                                                                                                                                                                                                                     |
|                                                   | $R^2_{adj}$                                                                                                                                                                                                                                                                                                                                                                                                                                                                                                                                                                                                                                                                                                                                                         | 0.9941                                       | 0.9958  | 0.9880  |                                                                                                                                                                                                                                                                                                                     |
|                                                   | AIC                                                                                                                                                                                                                                                                                                                                                                                                                                                                                                                                                                                                                                                                                                                                                                 | 61.9119                                      | 59.3787 | 73.4947 |                                                                                                                                                                                                                                                                                                                     |
|                                                   | MSC                                                                                                                                                                                                                                                                                                                                                                                                                                                                                                                                                                                                                                                                                                                                                                 | 4.9261                                       | 5.2761  | 4.2155  |                                                                                                                                                                                                                                                                                                                     |
| <b>Comparison result</b>                          | R2_adj, AIC and MSC of above three model were compared for drug release at different pH. All three model share close R2_adj value for pH 7.4 and 1.2 with difference for pH 6.8. Hence to understand the best fit model AIC was compared as minimum AIC represents best fit, it was observed that at all three pH AIC was minimum for Korsmeyer-peppas model along with high R2_adj value. Further MSC was compared by all the three methods and it was found that highest MSC value were for all the pH with Korsmeyer-peppas model, whereas Hopfenberg model presents closeness in terms of best fit model dissolution behaviour. Hence based on kinetic studies drug follows non-fickian diffusion (nearly n<0.8) along with disintegration of polymeric matrix. |                                              |         |         |                                                                                                                                                                                                                                                                                                                     |

*Table S4: Kinetic models studied for cyclosporine A release from CyA loaded micelle incorporated composite nanofibers at different pH values using DDSolver software. Table shows the best fit models based on comparison of statistical criteria including the adjusted coefficient of determination ( $R^2_{adj}$  or R2 adjusted), the Akaike Information Criterion (AIC), and the Model Selection Criterion (MSC). The three closest fit kinetic models were zero order, Korsmeyer-Peppas and Hopfenberg models respectively.*
